# Supplementary material for: Strain engineering and lattice vibration manipulation of atomically thin TaS2 films
Source: Royal Society of Chemistry journal article supplement (doi:10.1039/d0ra02499f), 2020-01-01
Supplement: d0ra02499f1.pdf [file d0ra02499f1.pdf]

## Supplementary Materials

# Strain engineering and lattice vibration manipulation of atomically thin TaS<sub>2</sub> films

*Xing Wu*<sup>1, #, \*</sup>, *Yongqing Cai*<sup>2, #</sup>, *Jihong Bian*<sup>3, #</sup>, *Guohui Su*<sup>1</sup>, *Chen Luo*<sup>1</sup>, *Yaodong Yang*<sup>3</sup>,  
*Gang Zhang*<sup>2, \*</sup>

<sup>1</sup> Shanghai Key Laboratory of Multidimensional Information Processing, School of Communication and Electronic Engineering, East China Normal University, 500 Dongchuan Road, Shanghai 200241, China.

<sup>2</sup> Institute of High Performance Computing (IHPC), A\*STAR, Singapore 138632, Singapore.

<sup>3</sup> Frontier Institute of Science and Technology, State Key Laboratory for Mechanical Behavior of Materials, Xi'an Jiaotong University, Xi'an 710054, China.

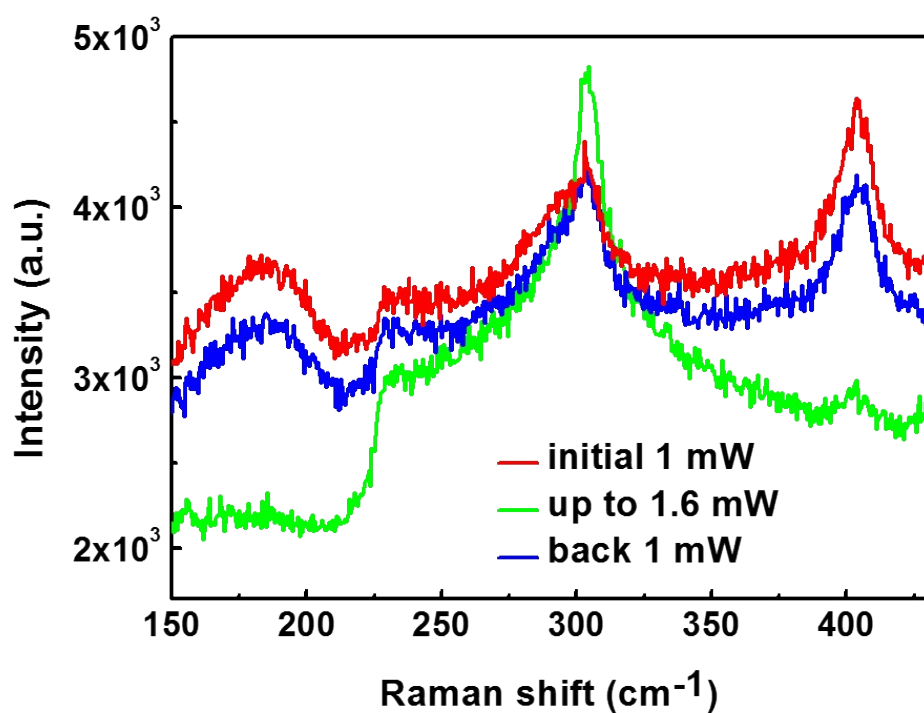

**Figure S1:** Raman spectra of the suspended 2H-TaS<sub>2</sub> flakes under different laser beam power values from 1 mW, 1.6 mW, and back to 1 mW. After irradiated under high laser beam power, the TaS<sub>2</sub> flake remains untainted, indicating the laser power of 1 mW used in the experiment introduces no additional destruction of the samples.

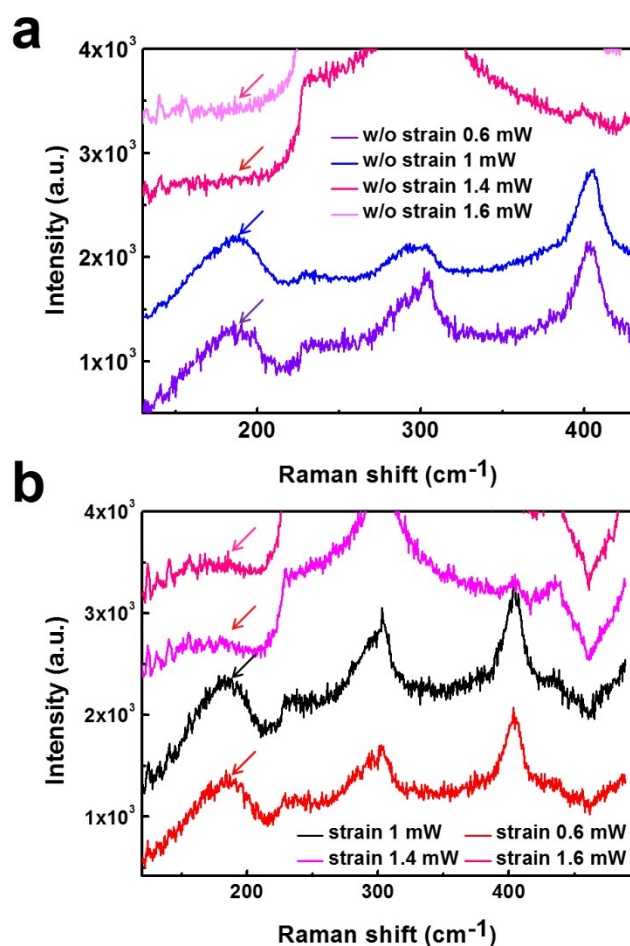

**Figure S2:** Raman spectra of 2H-TaS<sub>2</sub> under different laser beam power values with and without the compressive strain. (a) Irradiation power ranging from 0.8 mW to 1.6 mW, the two-phonon peak is suppressed above 1 mW, as indicated by the arrows. (b) Raman spectra collected on the strained 2H-TaS<sub>2</sub> flake. The two-phonon peak remains even above 1 mW, which is different from the unstrained samples. The two-phonon mode is enhanced with the compressive strain.

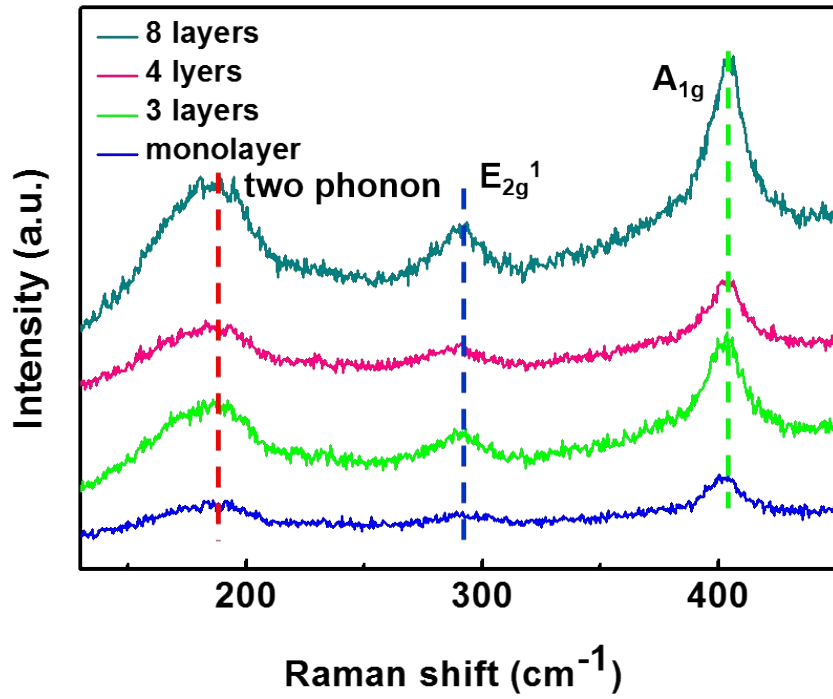

**Figure S3:** Thickness dependence of the unstrained 2H-TaS<sub>2</sub> flake. There is no obvious change in the E<sub>2g</sub><sup>1</sup> and A<sub>1g</sub> as the thickness increases. In comparison to MoS<sub>2</sub>, these two modes are highly thickness dependent.

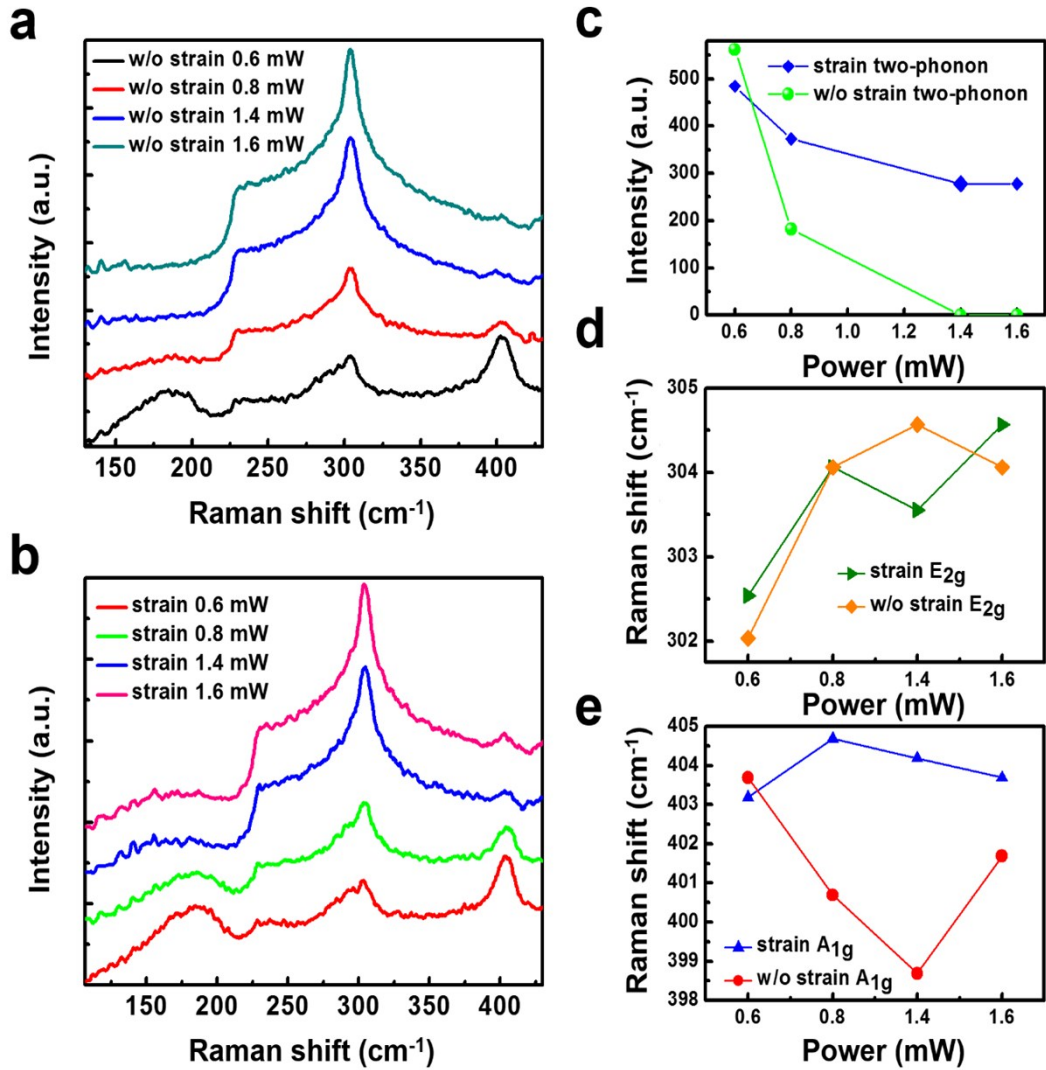

**Figure 4.** Raman characteristic of the suspended 2H-TaS<sub>2</sub> flake under different power of the laser beam: (a) without the compressive strain, and (b) with the compressive strain. Raman spectra of the two-phonon peak fade away with a high irradiation power of the laser beam. But the suspended 2H-TaS<sub>2</sub> flake impedes the phenomenon in (a). (c) Raman intensity of the two-phonon peak extracted from (a) and (b). (d) Raman shift of the (d) E<sub>2g</sub><sup>1</sup> peak, and (e) as a function of different powers of the laser beam.
